# Supplementary material for: Study of Structural and Optical Properties of Electrodeposited Silicon Films on Graphite Substrates
Source: MDPI journal article supplement (doi:10.3390/nano12030363), 2022-01-24
Supplement: s1 [file s1]

# Study of Structural and Optical Properties of Electrodeposited Silicon Films on Graphite Substrates

Muhammad Monirul Islam <sup>1,2,\*</sup>, Hajer Said <sup>3</sup>, Ahmed Hichem Hamzaoui <sup>3</sup>, Adel Mnif <sup>3</sup>, Takeaki Sakurai <sup>1</sup>, Naoki Fukata, <sup>1,4</sup> and Katsuhiro Akimoto <sup>1</sup>

<sup>1</sup> Institute of Applied Physics, University of Tsukuba, Tsukuba 305-8573, Ibaraki, Japan; sakurai@bk.tsukuba.ac.jp (T.S.); FUKATA.Naoki@nims.go.jp (N.F.); akimoto.katsuhiro.gf@u.tsukuba.ac.jp (K.A.)

<sup>2</sup> Alliance for Research on the Mediterranean and North Africa (ARENA), University of Tsukuba, Tsukuba 305-8573, Ibaraki, Japan

<sup>3</sup> Useful Materials Valorization Laboratory, National Centre for Research in Materials Science, Technological Park of Borj Cedria, B.P.73, Soliman 8027, Tunisia; hajer.said.doctorante@gmail.com (H.S.); mdmih10@gmail.com (A.H.H.); mnifirst@gmail.com (A.M.)

<sup>4</sup> International Center for Materials Nanoarchitectonics, National Institute for Materials Science, 1-1 Namiki, Tsukuba 305-0044, Ibaraki, Japan

\* Correspondence: islam.monir.ke@u.tsukuba.ac.jp

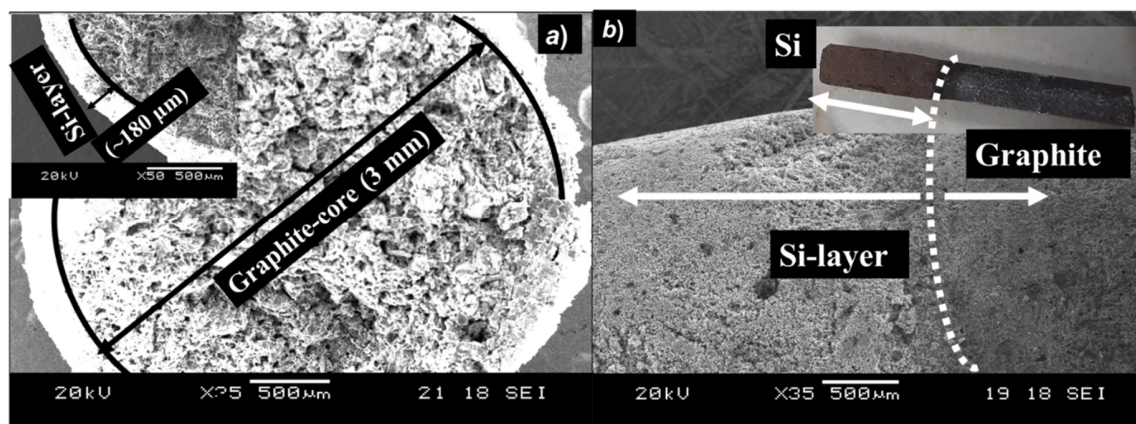

**Figure S1.** (a) Cross-sectional SEM image of the Si-coated graphite rod after electrochemical reduction of nano  $\text{SiO}_2$  at low potential and washed with HCL, (b) SEM image of the electrodeposited Si-layer of the similar sample, an optical image of which has been shown at the inset of b).
